# Supplementary material
Source: publisher figshare collection journal article supplement (https://acs.figshare.com/ndownloader/files/4024732)
Supplement: Supplementary file 1 [file 4024732]

# Greenhouse Gas Implications of Fleet Electrification based on Big Data-Informed Individual Travel Patterns

## Supporting Information

Hua Cai<sup>1,2</sup> and Ming Xu<sup>1,2 \*</sup>

1. School of Natural Resources and Environment, University of Michigan, Ann Arbor
2. Department of Civil and Environmental Engineering, University of Michigan, Ann Arbor

## Table of Contents

|                                                                                                                                                                                                                                                                                                     |    |
|-----------------------------------------------------------------------------------------------------------------------------------------------------------------------------------------------------------------------------------------------------------------------------------------------------|----|
| Additional Figures .....                                                                                                                                                                                                                                                                            | 2  |
| Figure S1. Average speed of each taxi based on the filtered dataset.....                                                                                                                                                                                                                            | 2  |
| Figure S2. The relationship between percent saving and absolute fuel cost reduction.....                                                                                                                                                                                                            | 2  |
| Figure S3. The complementary cumulative probability distribution of payback time with PHEVs regarding different battery sizes. (modeled with 30-min segments and battery cost at \$250/kwh). 3                                                                                                      |    |
| Figure S4 Minimum fuel cost saving required to payback battery cost under different purchasing subsidy scenarios (modeled with battery cost at \$500/kwh and payback time is ten years) .....                                                                                                       | 4  |
| Figure S5 Electrified miles per vehicle regarding to battery sizes. ....                                                                                                                                                                                                                            | 4  |
| Figure S6 Aggregated daily VMT data of February 4, 2008. Estimate electrification rate based on aggregated daily VMT could lead to statement such as that “Taxis with daily VMT less than 150 miles drive 40% of total VMT. Therefore, 150-mile batteries could electrify 40% of total taxi VMT.” 4 |    |
| Key Parameters.....                                                                                                                                                                                                                                                                                 | 5  |
| Table S1. Summary of Key Parameters Used in this study .....                                                                                                                                                                                                                                        | 5  |
| Sensitivity Analysis .....                                                                                                                                                                                                                                                                          | 6  |
| Fuel cost reduction .....                                                                                                                                                                                                                                                                           | 6  |
| Electrification rate.....                                                                                                                                                                                                                                                                           | 7  |
| Sensitivity analysis for greenhouse gas emission .....                                                                                                                                                                                                                                              | 8  |
| Impacts of the holiday on electrification rate.....                                                                                                                                                                                                                                                 | 9  |
| References .....                                                                                                                                                                                                                                                                                    | 11 |

## Additional Figures

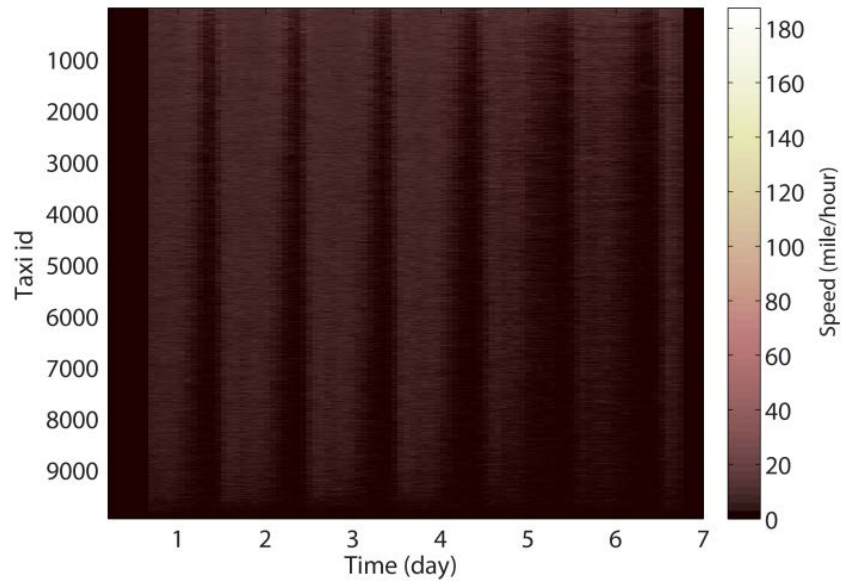

**Figure S1.** Average speed of each taxi based on the filtered dataset.

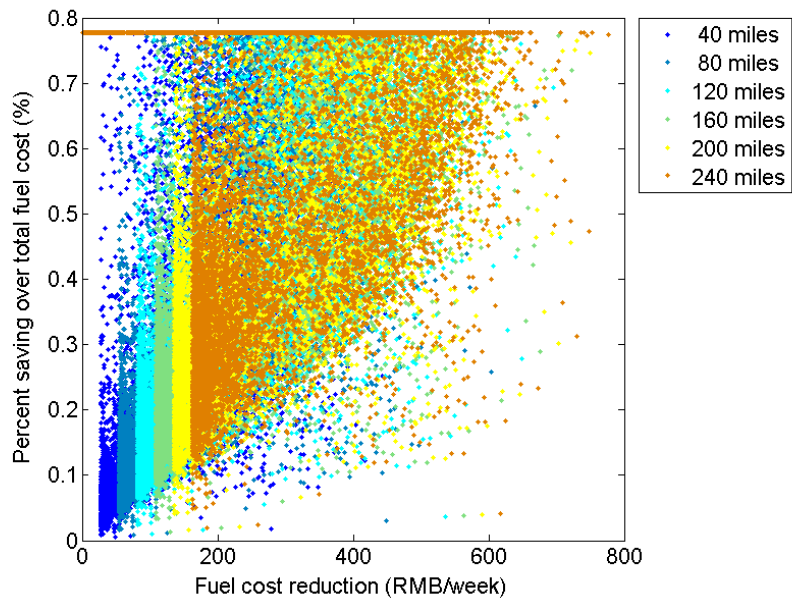

**Figure S2.** The relationship between percent saving and absolute fuel cost reduction.

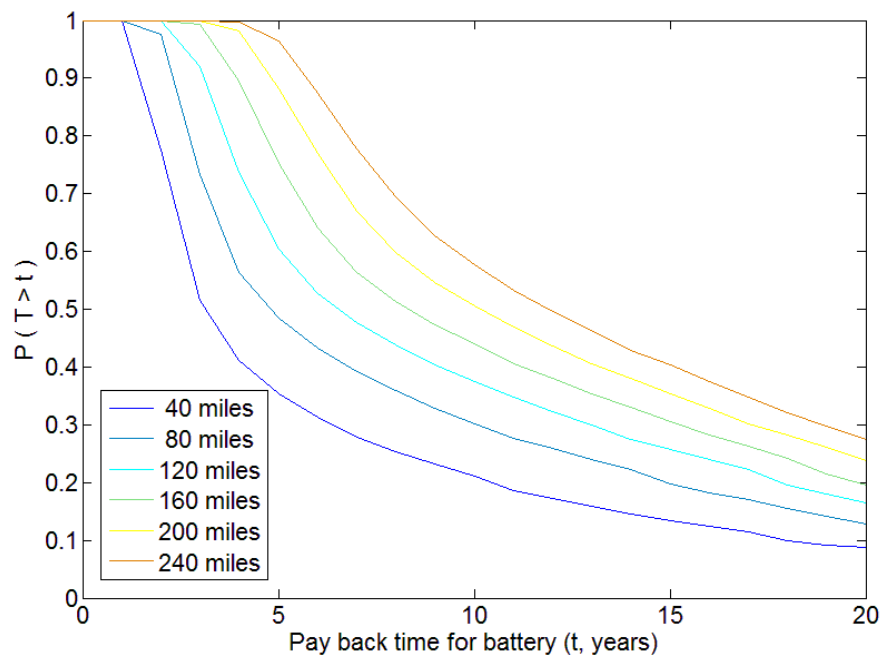

**Figure S3. The complementary cumulative probability distribution of payback time with PHEVs regarding different battery sizes (modeled with 30-min segments and battery cost at \$250/kwh).**

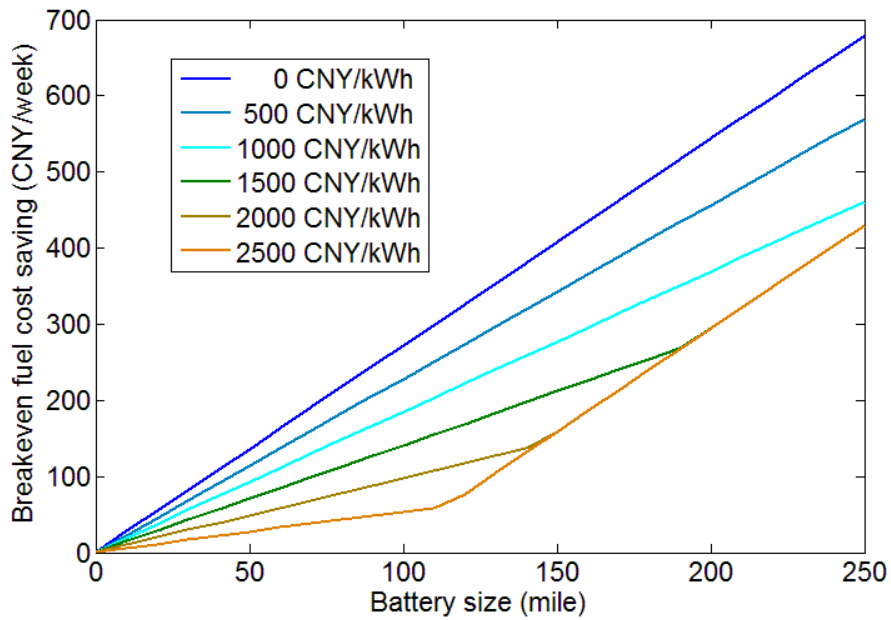

**Figure S4. Minimum fuel cost saving required to payback battery cost under different purchasing subsidy scenarios (modeled with battery cost at \$500/kwh and payback time is ten years).**

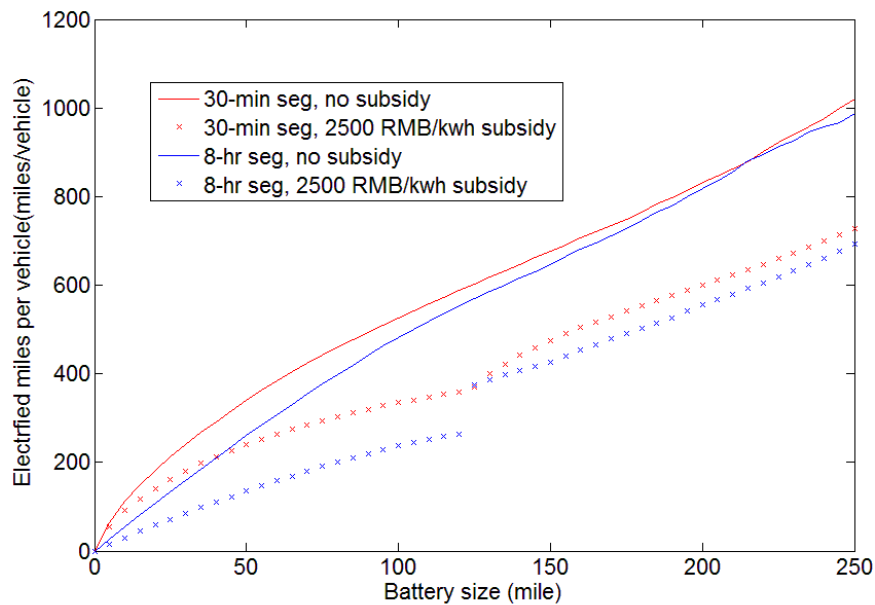

**Figure S5. Electrified miles per vehicle regarding to battery sizes.**

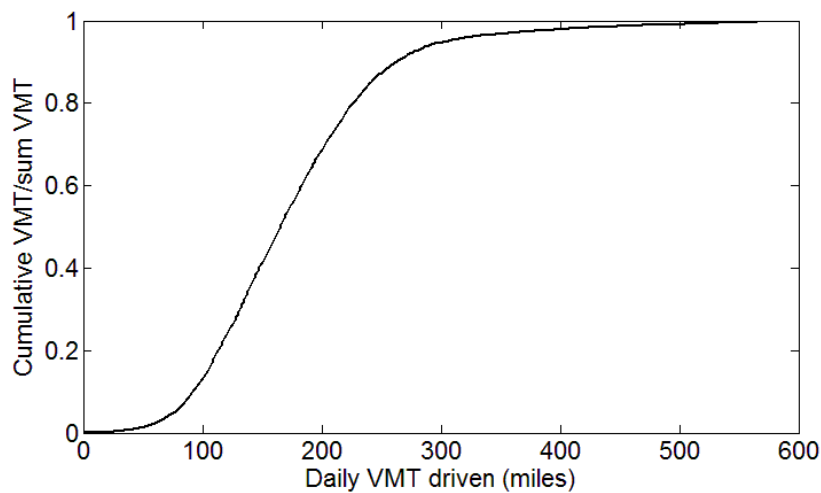

**Figure S6. Aggregated daily VMT data of February 4, 2008.** Estimate electrification rate based on aggregated daily VMT could lead to statement such as that “Taxis with daily VMT less than 150 miles drive 40% of total VMT. Therefore, 150-mile batteries could electrify 40% of total taxi VMT.”

## Key Parameters

**Table S1. Summary of Key Parameters Used in this study.**

| Parameters                                                              | Value                                                                                                                            | Rationale                                                    |
|-------------------------------------------------------------------------|----------------------------------------------------------------------------------------------------------------------------------|--------------------------------------------------------------|
| Electricity price                                                       | 0.488 CNY/kWh                                                                                                                    | Current electricity price in Beijing                         |
| Gasoline price                                                          | 8.06 CNY/L                                                                                                                       | Current gasoline price in Beijing                            |
| Fuel economy of PHEV (CD mode)                                          | 0.35 kWh/mile <sup>1</sup>                                                                                                       | Based on 2013 Volt                                           |
| Fuel economy of PHEV (CS mode)                                          | 35 mile/gal <sup>1</sup>                                                                                                         | City travel of on 2013 Volt                                  |
| Fuel economy of ICE vehicles                                            | 35 mile/gal <sup>1</sup>                                                                                                         | Assumed to be the same as PHEV in CS mode                    |
| Charging voltage, current, and efficiency                               | 240V, 16A, 88% <sup>2</sup>                                                                                                      | Moderate charging speed and efficiency                       |
| Baseline battery price                                                  | \$500/kWh <sup>3</sup>                                                                                                           | Current battery price                                        |
| Government subsidy                                                      | 2,500 CNY/kWh with cap of 100,000 CNY/vehicle <sup>4</sup>                                                                       | Current level subsidy for PHEV in China                      |
| Greenhouse gas emission factor (battery)                                | 120 kg CO <sub>2</sub> -eq/kWh <sup>5</sup>                                                                                      | Emission factor for Li-ion battery                           |
| Greenhouse gas emission factors (fuel cycle)                            | 224.4 g CO <sub>2</sub> -eq/km (gasoline vehicle);<br>236.7 g CO <sub>2</sub> -eq/km (electric vehicle North grid); <sup>6</sup> | Best available vehicle fuel cycle emission factors for China |
| Average CO <sub>2</sub> intensity for natural gas generated electricity | 0.47 kg CO <sub>2</sub> /kWh <sup>7</sup>                                                                                        | China electricity sector data                                |

## Sensitivity Analysis

### Fuel cost reduction

Table S2. Sensitivity analysis results for fuel cost reduction.

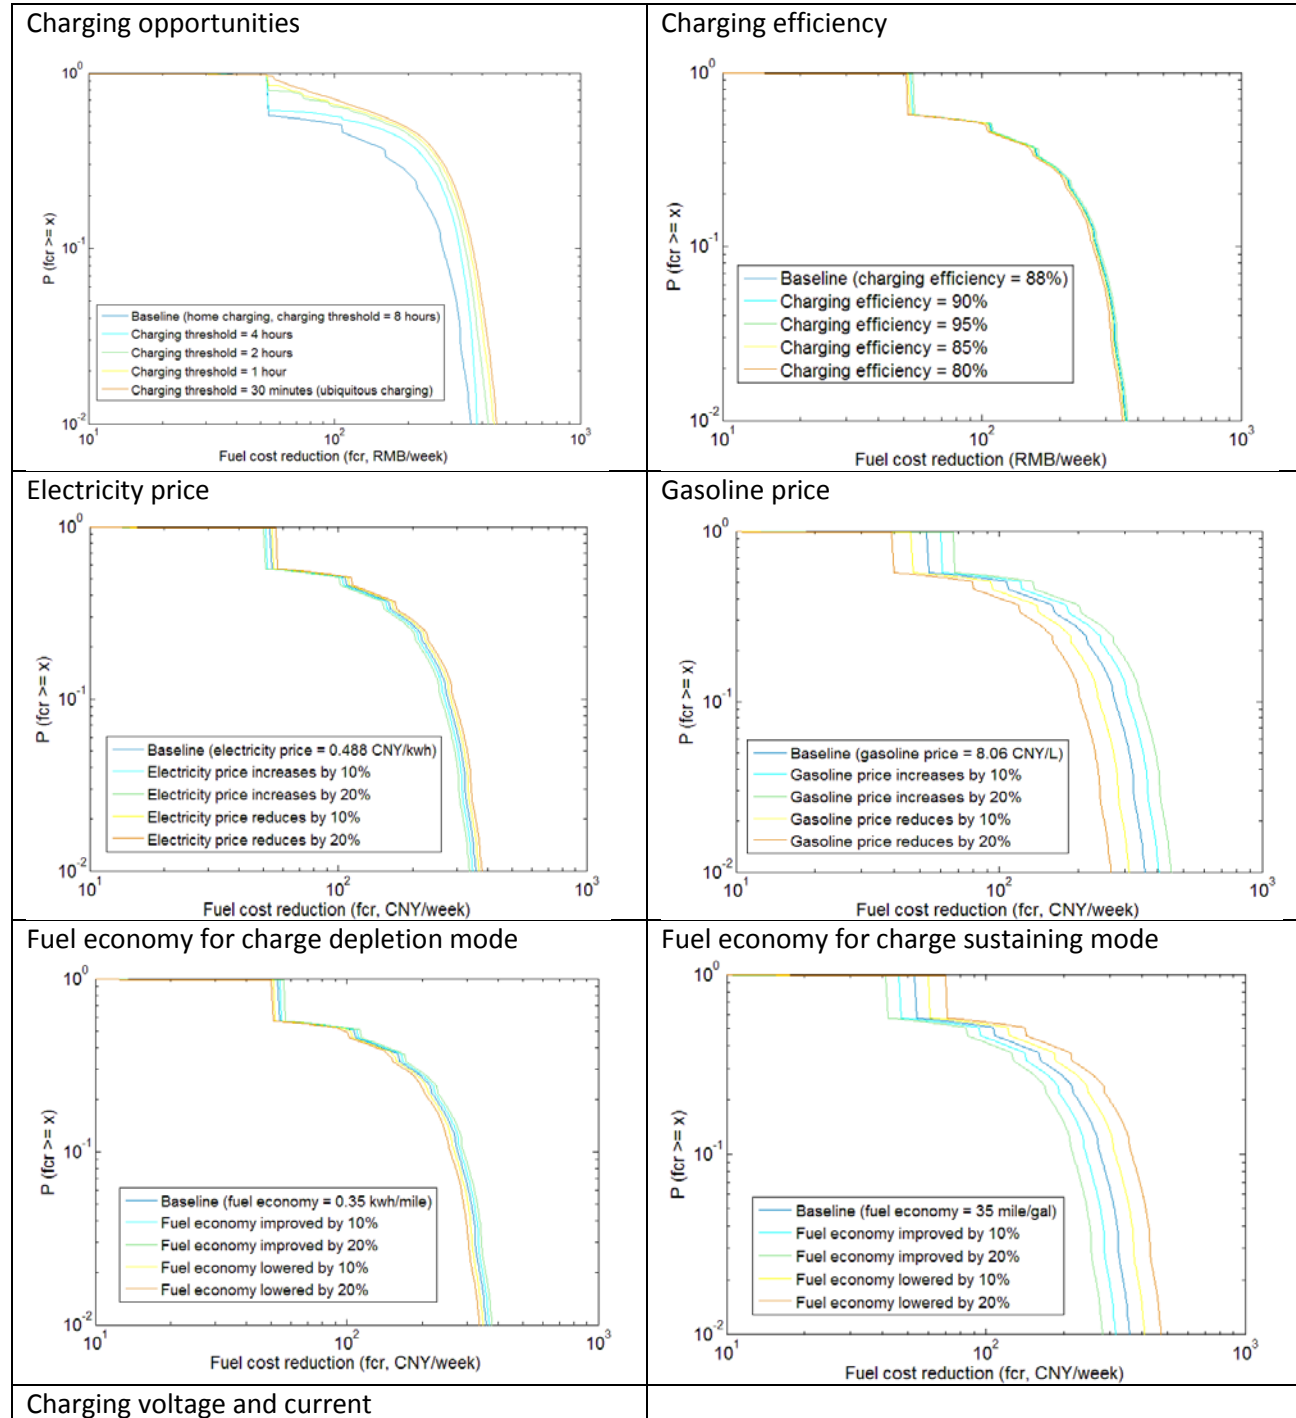

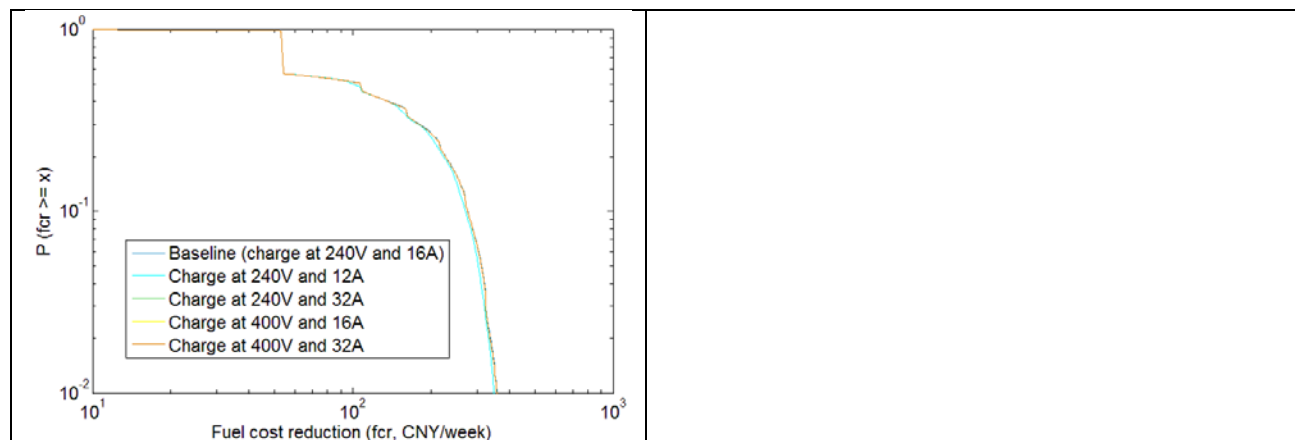

## Electrification rate

**Table S3. Sensitivity analysis results for electrification rate.**

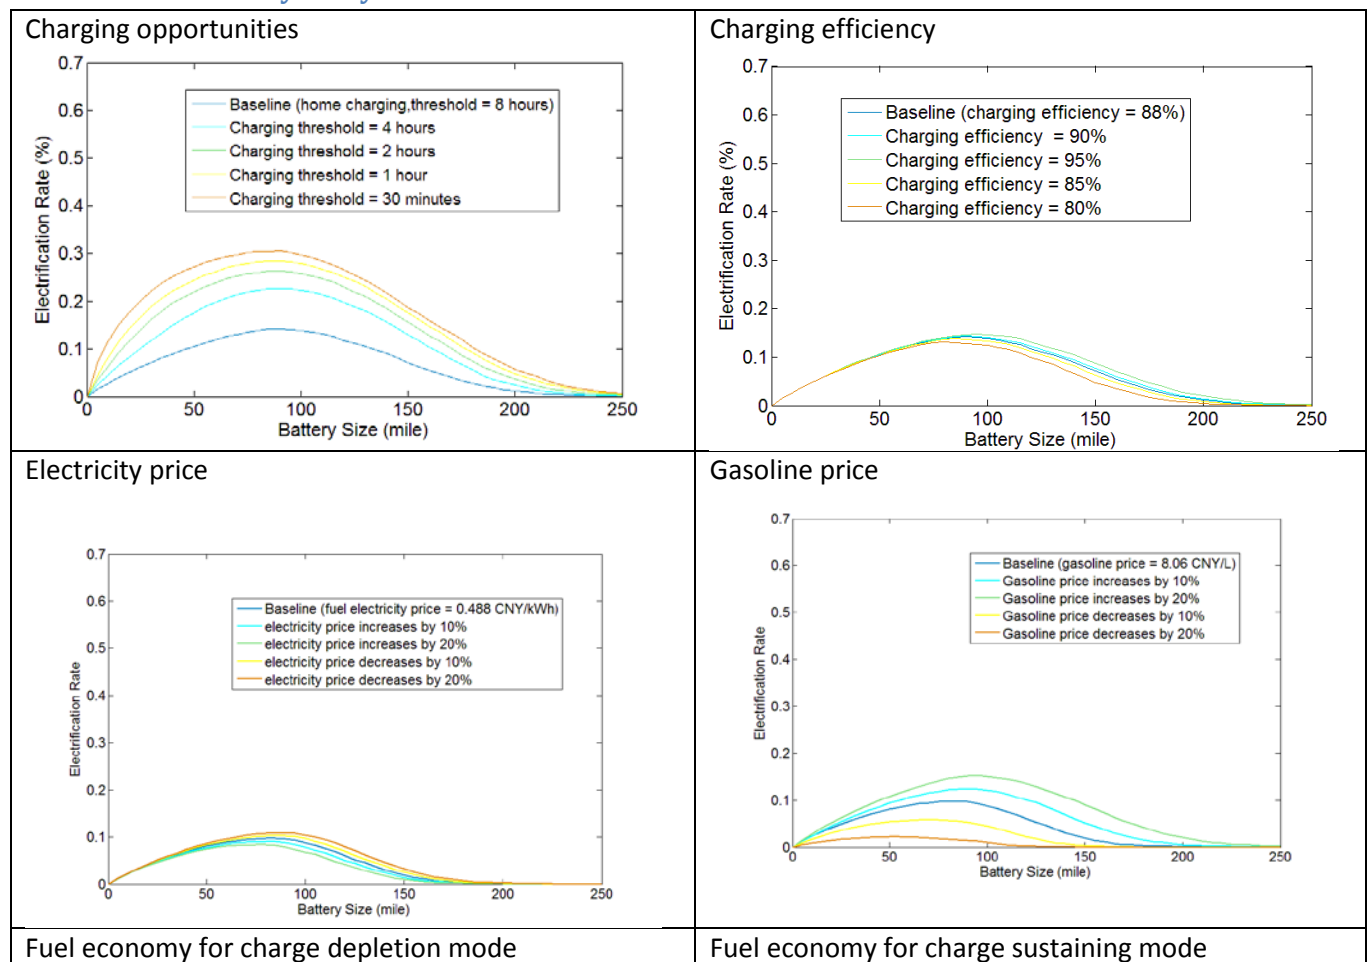

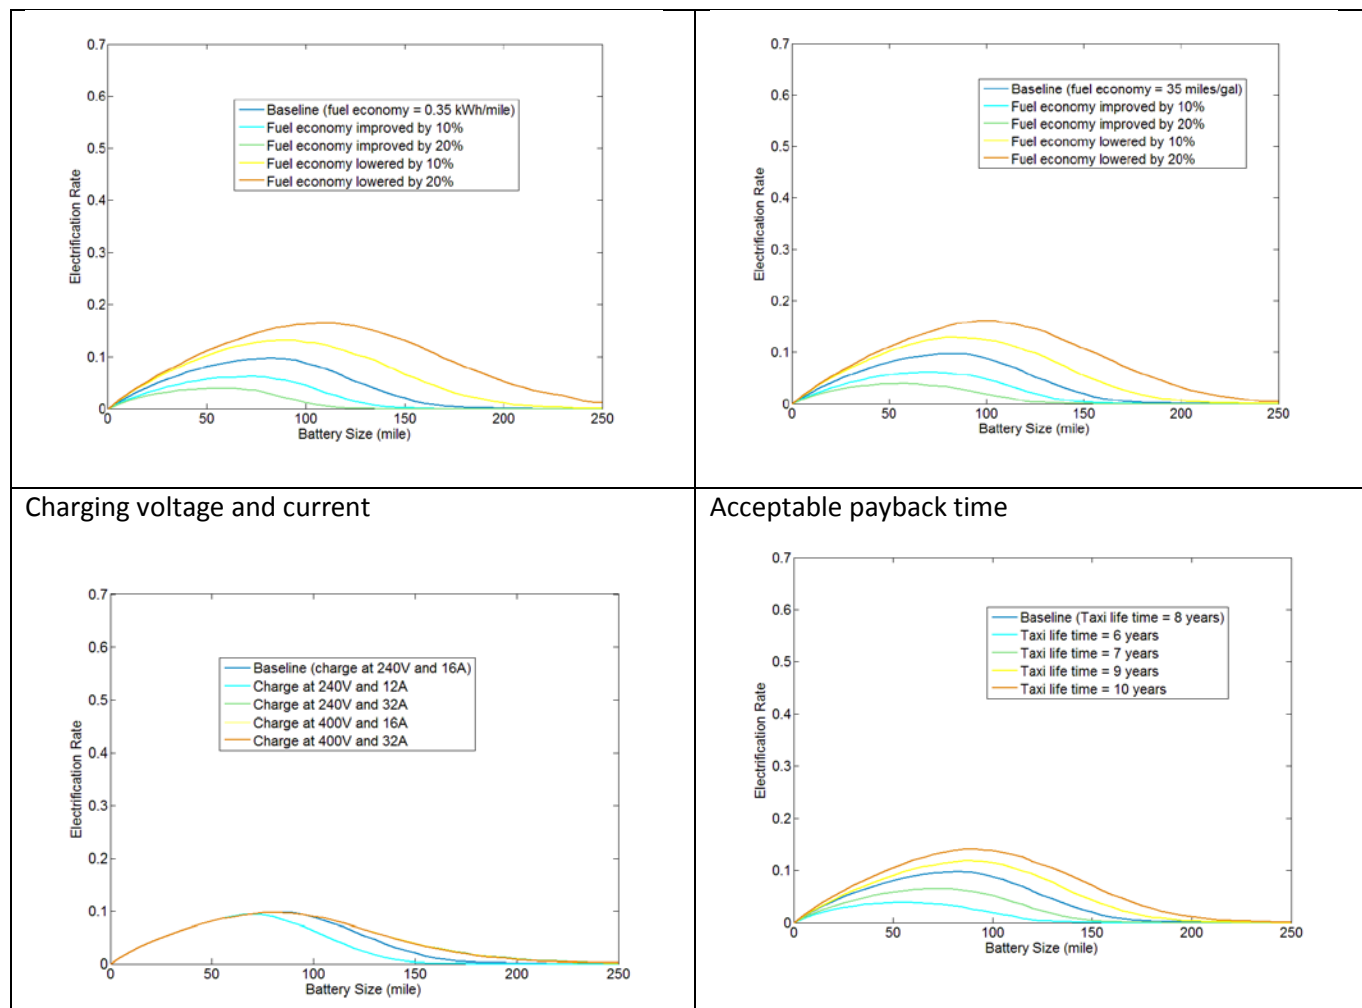

## Sensitivity analysis for greenhouse emission

Table S4. Results of sensitivity test for emission factors.

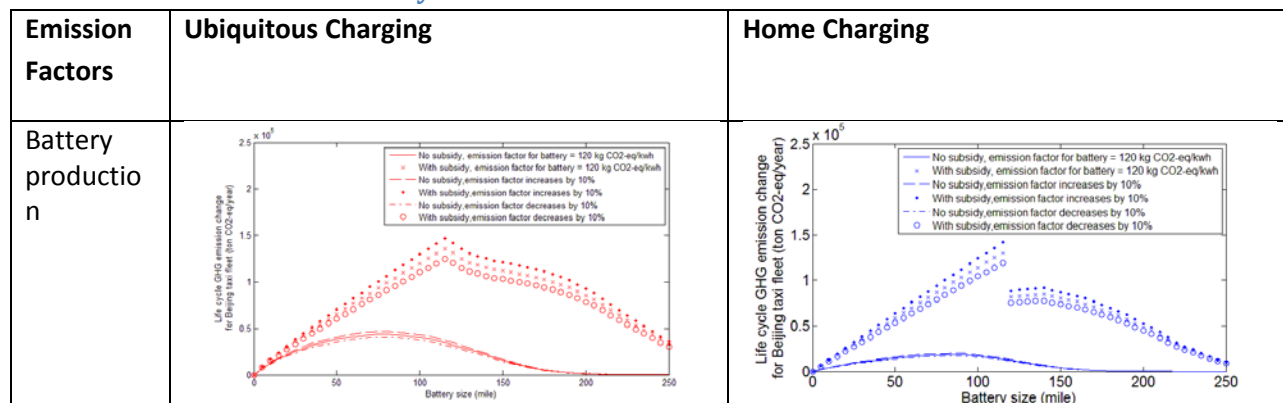



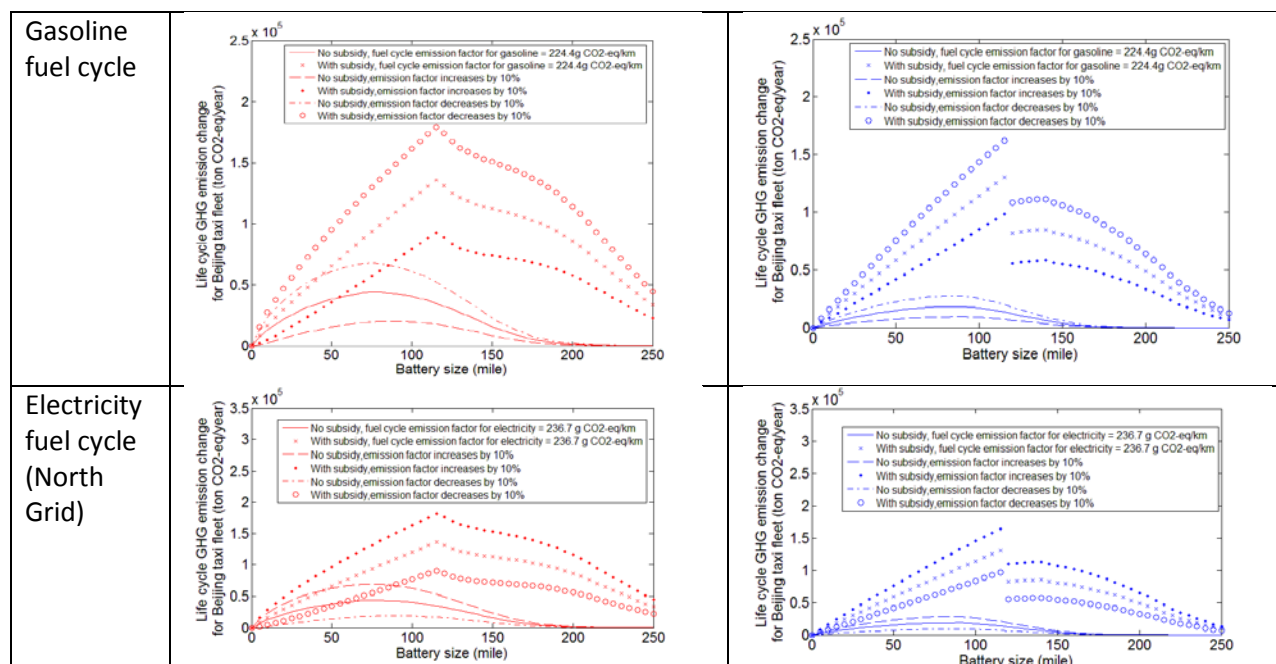

### Impacts of the holiday on electrification rate

Because February 7<sup>th</sup>, 2008 was the New Year's Day based on lunar's calendar, a major Chinese holiday, we separate the data sets into two subsets to analyze the impacts of the holiday on the results. The "before holiday" dataset contains data from February 2<sup>nd</sup> to 5<sup>th</sup>, and the "holiday" dataset contains data from February 6<sup>th</sup> (Chinese New Year's Eve) to February 8<sup>th</sup>. Because the relationship of electrification rate and battery size is the basis for subsequent subsidy and emission analysis, only electrification rate data are presented here in the table below. To allow side by side comparison, we also include side by side results at three different battery price levels.

**Table S5. Comparison of electrification rate of total fleet VMT using different data sets.**

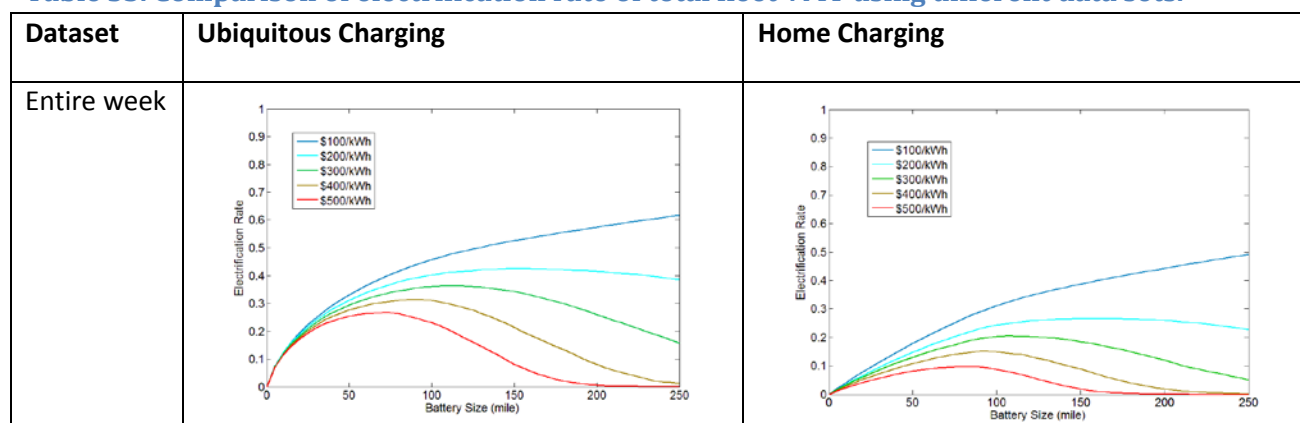

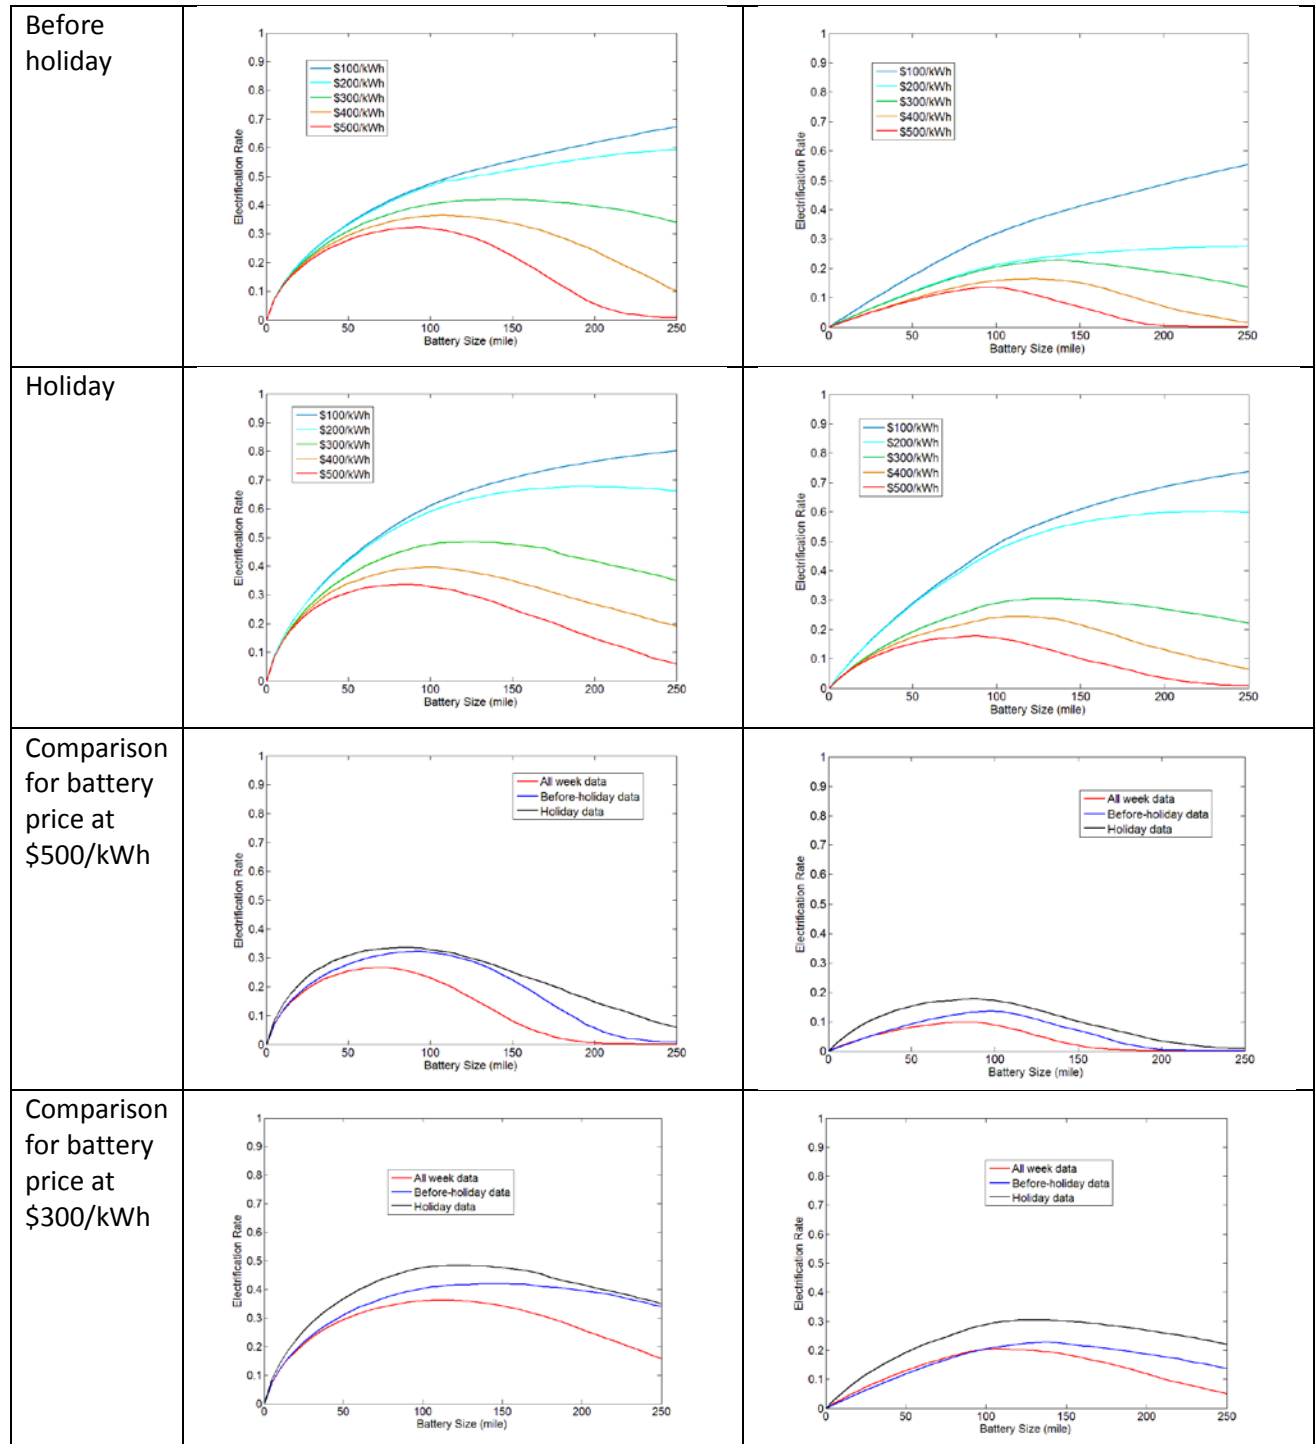

Comparison  
for battery  
price at  
\$100/kWh

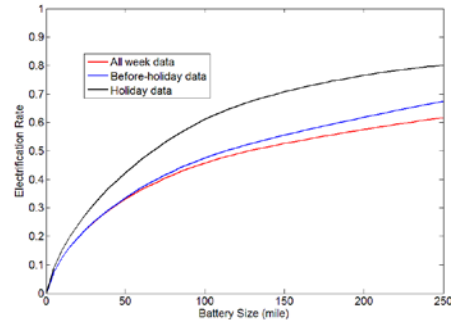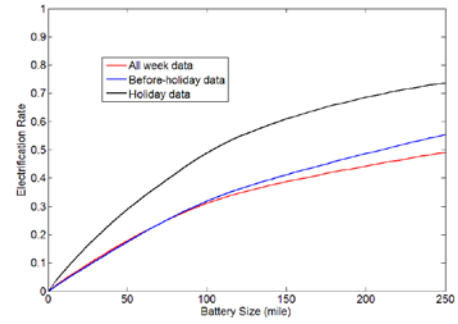

## References

1. DOE US. New Plug-in Hybrids. Available from URL: <http://www.fueleconomy.gov/feg/phevsbs.shtml>.
2. Kelly JC, MacDonald JS, Keoleian GA. Time-dependent plug-in hybrid electric vehicle charging based on national driving patterns and demographics. *Applied Energy* 2012;94(0): 395-405.
3. Howell D. Battery Status and Cost Reduction Prospects: U.S. Department of Energy, 2012.
4. MOF. Pilot Program of Subsidies for Private Purchase of New Energy Vehicles in Beijing (in Chinese), 2010.
5. Samaras C, Meisterling K. Life Cycle Assessment of Greenhouse Gas Emissions from Plug-in Hybrid Vehicles: Implications for Policy. *Environmental Science & Technology* 2008;42(9): 3170-76.
6. Huo H, Zhang Q, Wang MQ, Streets DG, He K. Environmental Implication of Electric Vehicles in China. *Environmental Science & Technology* 2010;44(13): 4856-61.
7. Cai W, Wang C, Wang K, Zhang Y, Chen J. Scenario analysis on CO<sub>2</sub> emissions reduction potential in China's electricity sector. *Energy Policy* 2007;35(12): 6445-56.
